# Supplementary material for: Handgrip Strength and Current Smoking Are Associated with Cardiometabolic Risk in Korean Adolescents: A Population-Based Study
Source: PubMed Central journal article supplement (PMC7400210; doi:10.3390/ijerph17145021), 2020-07-13
Supplement: ijerph-17-05021-s001.pdf [file ijerph-17-05021-s001.pdf]

Figure S1.

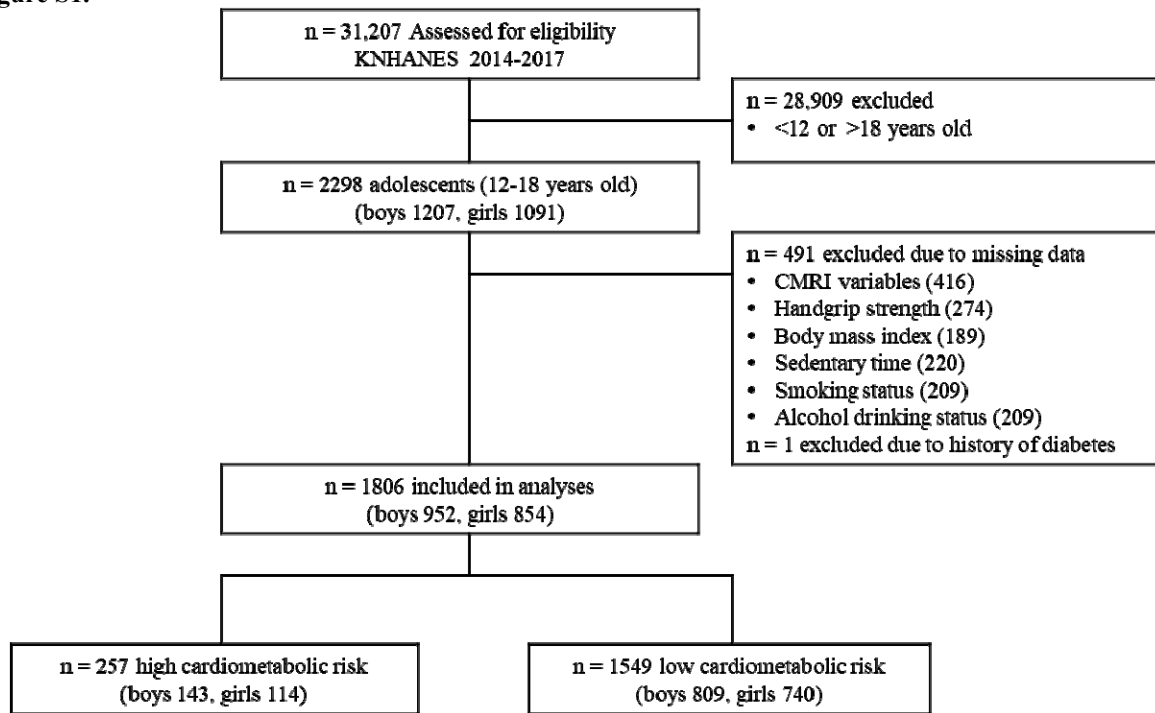

Table S1. Mean handgrip and relative handgrip strength according to age and sex.

| Age (years)         | Number |       | Handgrip strength (kg) |                       | Relative handgrip strength |             |
|---------------------|--------|-------|------------------------|-----------------------|----------------------------|-------------|
|                     | Boys   | Girls | Boys                   | Girls                 | Boys                       | Girls       |
| 12                  | 126    | 120   | 20.8±0.5 <sup>†</sup>  | 18.5±0.4 <sup>†</sup> | 0.426±0.009 <sup>†</sup>   | 0.389±0.007 |
| 13                  | 165    | 133   | 26.8±0.5 <sup>†</sup>  | 20.5±0.4 <sup>†</sup> | 0.471±0.008 <sup>†</sup>   | 0.408±0.007 |
| 14                  | 136    | 127   | 31.1±0.7 <sup>†</sup>  | 20.1±0.3 <sup>†</sup> | 0.505±0.011 <sup>†</sup>   | 0.391±0.007 |
| 15                  | 142    | 117   | 32.8±0.5 <sup>†</sup>  | 21.8±0.4              | 0.512±0.010                | 0.403±0.008 |
| 16                  | 129    | 131   | 34.6±0.7               | 22.5±0.4              | 0.537±0.011                | 0.407±0.009 |
| 17                  | 125    | 129   | 35.4±0.6               | 22.8±0.4              | 0.542±0.010                | 0.402±0.009 |
| 18                  | 129    | 97    | 35.4±0.6               | 22.3±0.5              | 0.536±0.010                | 0.396±0.010 |
| Total               | 952    | 854   | 31.7±0.3               | 21.4±0.2              | 0.510±0.004                | 0.400±0.003 |
| <i>P</i> for trend* |        |       | <0.001                 | <0.001                | <0.001                     | 0.306       |

Values are the weighted means ± standard errors.

\**P* for trend values by complex-sample general linear models.

<sup>†</sup>*P* < 0.05 by *post hoc* analyses, age 18 years old as reference.
